# Supplementary material for: Bortezomib-encapsulated metal–phenolic nanoparticles for intracellular drug delivery
Source: Royal Society of Chemistry journal article supplement (doi:10.1039/d4ra03504f), 2024-01-01
Supplement: d4ra03504f2.pdf [file d4ra03504f2.pdf]

## Table of contents

|                                        |    |
|----------------------------------------|----|
| DLS in Fig. 1F.....                    | 1  |
| FT-IR in Fig. 2.....                   | 2  |
| UV-is in Fig. 3A.....                  | 3  |
| XRD in Fig. 3B.....                    | 4  |
| Stability in Fig. 4A.....              | 5  |
| Drug release in Fig. 5B.....           | 6  |
| TA cytotoxicity HUVEC in Fig. 6A.....  | 7  |
| TA cytotoxicity Saos-2 in Fig. 6B..... | 8  |
| Cytotoxicity Saos-2 in Fig. 7A.....    | 9  |
| Cytotoxicity OPM-2 in Fig. 7B.....     | 10 |

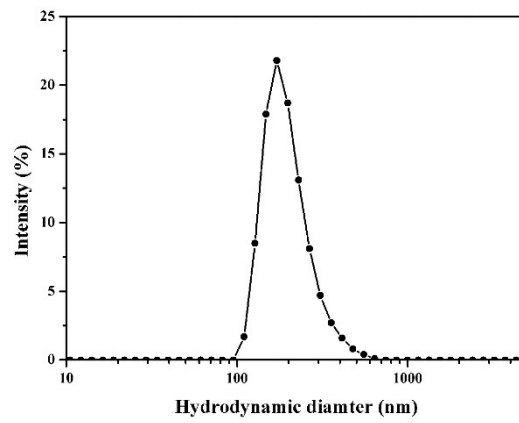

**DLS in Fig. 1F:** The DLS result of BTZ NPs with the feeding mass ratio of BTZ, TA, and  $\text{Fe}^{3+}$  at 75:240:1.

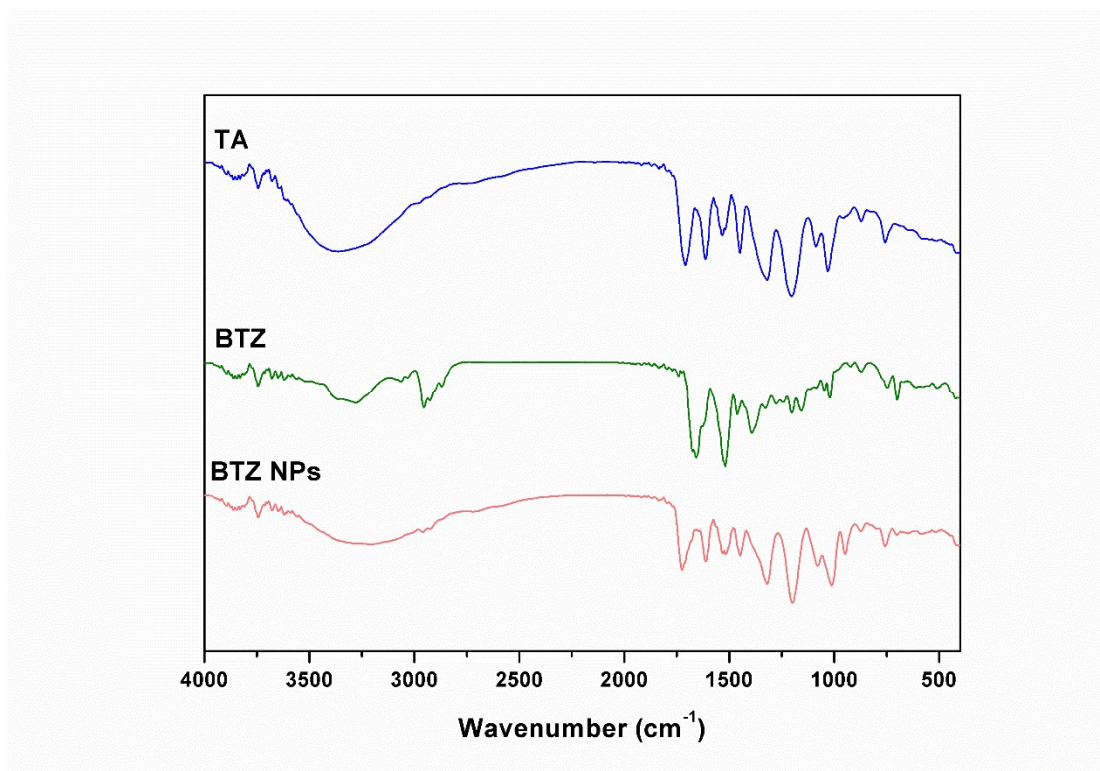

**FT-IR in Fig. 2:** The FT-IR spectra of TA, BTZ, and BTZ NPs.

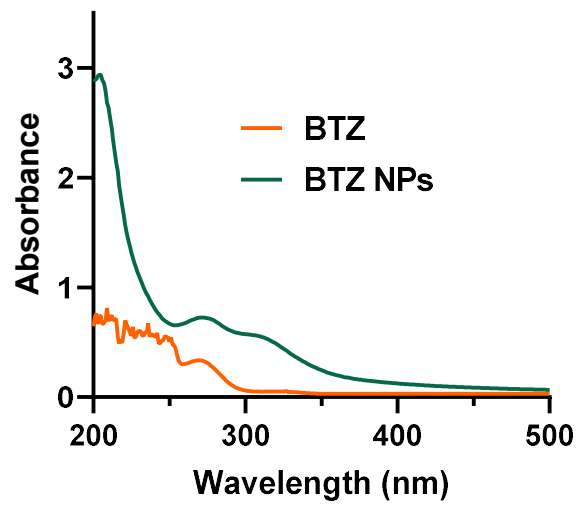

**UV-vis in Fig. 3A:** The UV-vis spectra of BTZ and BTZ NPs with the wavelength from 200 nm to 500 nm.

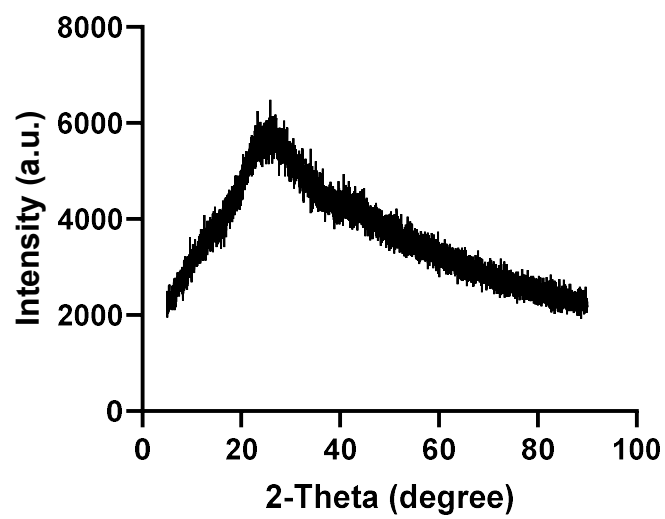

**XRD in Fig. 3B:** The XRD pattern of BTZ NPs.

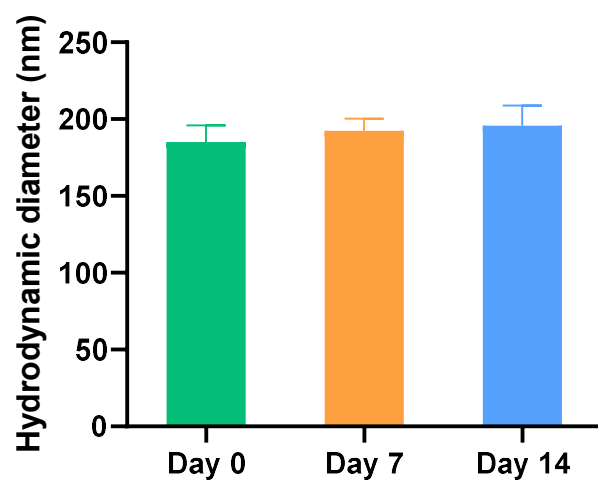

**Stability in Fig. 4A:** The hydrodynamic diameters of BTZ NPs in aqueous solution after incubating at 4 °C for 0, 7, and 14 days.

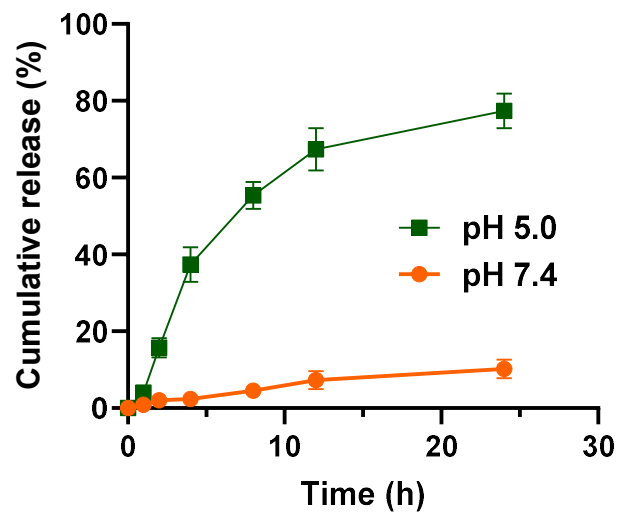

**Drug release in Fig. 5B:** The cumulative release of BTZ from BTZ NPs after incubating at pH 7.4 or 5.0 for different time intervals.

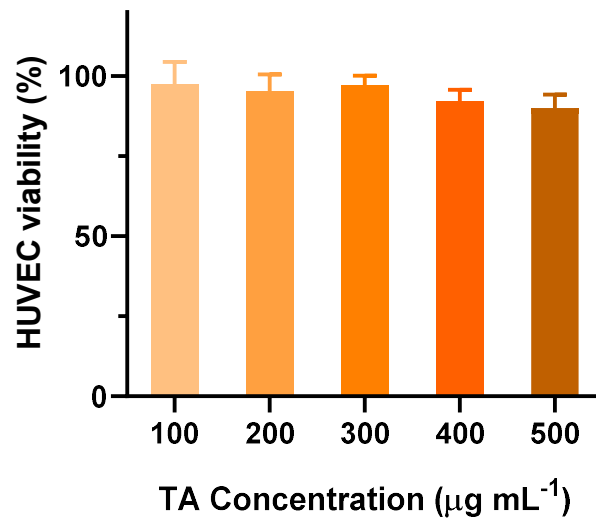

**TA cytotoxicity HUVEC in Fig. 6A:** Cell viability of HUVEC cells incubated with various concentrations of TA for 48 h.



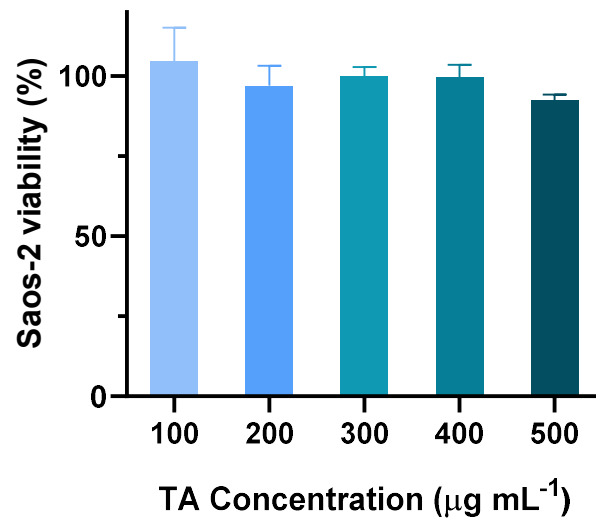

**TA cytotoxicity Saos-2 in Fig. 6B:** Cell viability of Saos-2 cells incubated with various concentrations of TA for 48 h.

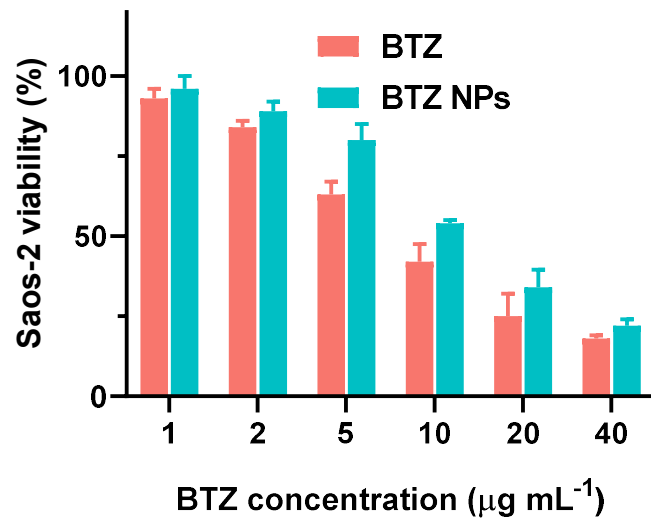

**Cytotoxicity Saos-2 in Fig. 7A:** Cell viability of Saos-2 cells incubated with various concentrations of free BTZ and BTZ NPs for 48 h.

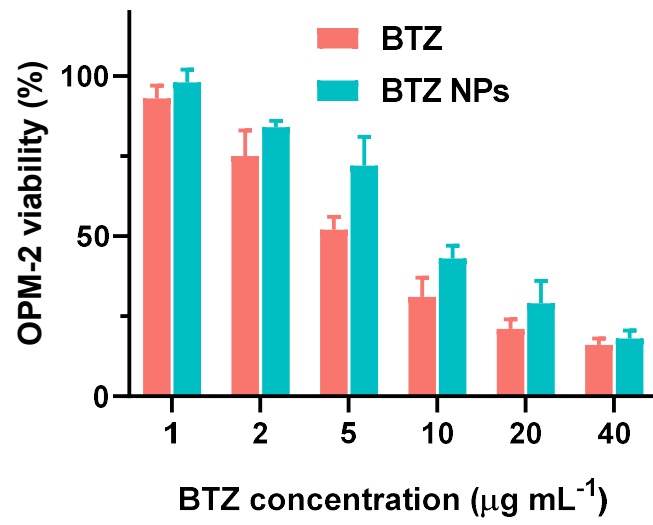

**Cytotoxicity OPM-2 in Fig. 7B:** Cell viability of OPM-2 cells incubated with various concentrations of free BTZ and BTZ NPs for 48 h.
